# Supplementary material
Source: Research Square preprint supplement (doi:10.21203/rs.3.rs-9882340/v1)
Supplement: Supplementary file 1 [file 5f9fc56bb9d78049b67ad9c0.doc]

Supplementary information

**Figure 9:** Atomic number of the donor atoms on the ligands and complexes.

**Table 6:** Molecular electrostatic potentials of ligands and complexes.

| **Compound** | **Atom** | **MEP (−1×10−3)** |
| --- | --- | --- |
| **H2mpc with Et3NH** | N8  S33 | 383.7  365.7 |
| **H2mpc only** | N8  S10 | 329.9  255.8 |
| **Re-mpc complex with Et3NH** | N18  S39  N25 | 92.1  274.8  38.0 |
| S40 | 93.8 |
| **Re-Hmpc complex** | N8  S10  N32  S23 | 69.7  4.3  76.8  149.9 |
